# Supplementary material
Source: Research Square preprint supplement (doi:10.21203/rs.3.rs-9064485/v1)
Supplement: Supplementary file 1 [file 3961d8b6ede3108492edea12.docx]

**Supplementary table 1:** Demographic characteristics, special habits, medical, and family history of the participating Parkinson's patients (n=74)

|  | | | N | % |
| --- | --- | --- | --- | --- |
| Age in years (mean±SD) | | | 61±8 | |
| Gender | Male | | 74 | 100.0% |
| Functioning | Non-functioning | | 9 | 12.2% |
| Functioning | | 28 | 37.8% |
| Functioning and retired | | 37 | 50.0% |
| Smoking | Non-smoker | | 25 | 33.8% |
| Smoker | | 23 | 31.1% |
| Ex-smoker | | 26 | 35.1% |
| Substance abuse | Non-user | | 74 | 100.0% |
| Consanguinity | No | | 59 | 79.7% |
| Yes | | 15 | 20.3% |
| Parkinson’s family history | No | | 59 | 79.7% |
| Yes | | 15 | 20.3% |
| Age of onset in years (mean±SD) | | 57±8 | | |

*Variables are presented as numbers and percentages or means and standard deviation (SD)*

**Supplementary table 2:** Description of hormonal and penile duplex diagnostics among the participating Parkinson's patients (n=74)

| Hormonal | | |
| --- | --- | --- |
|  | Median | Q1-Q3 |
| Prolactin ng/mL | 4.10 | 2.82-5.21 |
|  | Mean | SD |
| Total testosterone ng/mL | 6.49 | 1.46 |
| Free testosterone pg/mL | 152.08 | 44.35 |
| Vascular | | |
| PSVcm/s 30 min | 41.6 | 2.8 |
| EDVcm/s 30 min | 2.4 | 1.3 |
| RI | .84 | .08 |

*Variables are presented as median and interquartile range (Q1-Q3) or means and standard deviation (SD)*

*PSV: Peak systolic velocity. EDV: End diastolic volume, RI: Resistive index*

**Supplementary table 3:** Association between parkinson’s family history, drugs and age of onset with IIEF-5 categories among the participating Parkinson's patients (n=74)

|  | Total | | IIEF-5 | | | | | | | | | | P-value |
| --- | --- | --- | --- | --- | --- | --- | --- | --- | --- | --- | --- | --- | --- |
| No ED | | Mild ED | | Mild to moderate ED | | Moderate ED | | Severe ED | |
| N | % | N | % | N | % | N | % | N | % | N | % |
| Parkinson’s family history | 15 | 20.3 | 1 | 6.7 | 0 | 0.0 | 8 | 53.3 | 4 | 26.7 | 2 | 13.3 | *0.628 |
| Levodopa | 40 | 54.1 | 4 | 10.0 | 1 | 2.5 | 18 | 45.0 | 8 | 20.0 | 9 | 22.5 | ***0.013** |
| Dopamine agonists | 24 | 32.4 | 2 | 8.3 | 4 | 16.7 | 10 | 41.7 | 6 | 25.0 | 2 | 8.3 | *0.461 |
| Amantadine | 36 | 48.6 | 3 | 8.3 | 4 | 11.1 | 17 | 47.2 | 8 | 22.2 | 4 | 11.1 | *0.928 |
| Anticholinergic | 33 | 44.6 | 5 | 15.2 | 1 | 3 | 17 | 51.5 | 4 | 12.1 | 6 | 18.2 | *0.095 |
| MAOI | 18 | 24.3 | 2 | 11.1 | 3 | 16.7 | 6 | 33.3 | 5 | 27.8 | 2 | 11.1 | *0.447 |
| B-blocker | 4 | 5.4 | 1 | 25.0 | 0 | 0.0 | 2 | 50.0 | 1 | 25.0 | 0 | 0.0 | *0.722 |
| Age of onset in years (mean±SD) | 57±8 | | 49±6abc | | 55±7de | | 56±7afg | | 63±5bdf | | 64±8ceg | | **^<0.001** |
| Age (mean±SD) | 61±8 | | 51±5abc | | 57±7de | | 59±7afg | | 67±5bdf | | 69±8ceg | | **^<0.001** |

*Variables are presented as numbers and percentages or means and standard deviation (SD)*

*IIEF-5: The international index of erectile function- 5items, ED: Erectile dysfunction*

** Chi-square test was used*

*^ One-way ANOVA test was used*

*Superscript letters show pairwise significance using LSD tests. Categories with the same letter show significance difference.*

*Bold p-values are significant at level≤0.05*

**Supplementary table 4:** Association between levodopa and IIEF-5 score as well as other hormonal and penile duplex diagnostics among the participating Parkinson’s patients (n=74)

|  | Levodopa | | | | P-value |
| --- | --- | --- | --- | --- | --- |
| No | | Yes | |
| Mean | SD | Mean | SD |
| IIEF-5 score | 14.5 | 3.6 | 12.1 | 5.1 | **0.021*** |
| Hormonal | | | | | |
| Prolactin (median [Q1-Q3))  ng/mL | 4.8(3.7-11.3) | | 5.1(3.6-10.3) | | 0.965# |
| Total testosterone ng/mL | 5.7 | 1.6 | 5.0 | 1.5 | 0.092* |
| Free testosterone pg/mL | 124.5 | 42.3 | 101.9 | 46.5 | **0.033*** |
| Vascular | | | | | |
| PSV cm/s 30 min | 36.5 | 5.3 | 34.1 | 6.3 | 0.091* |
| EDV cm/s 30 min | 3.6 | 1.2 | 3.8 | 1.6 | 0.513* |
| RI | 0.77 | 0.09 | 0.76 | 0.13 | 0.531* |

*Variables are presented as means and standard deviation (SD)*

*IIEF-5: The international index of erectile function- 5items, PSV: Peak systolic velocity. EDV: End diastolic volume, RI: Resistive index*

**Student T test was used*

*#Mann-Whitney U test was used*

*Bold p-values are significant at level≤0.05*

**Supplementary table 5:** Correlation between IIEF-5 score and PDQ 39 score

| IIEF-5 score | | |
| --- | --- | --- |
| PDQ 39 total score | R | -0.387 |
| P-value | **0.001** |
| Mobility | R | -0.490 |
| P-value | **<0.001** |
| ADL | R | -0.412 |
| P-value | **<0.001** |
| Emotional wellbeing | R | -0.135 |
| P-value | 0.251 |
| Stigma | R | -0.123 |
| P-value | 0.298 |
| Social support | R | -0.008 |
| P-value | 0.944 |
| Cognition | R | -0.348 |
| P-value | **0.002** |
| Communication | R | -0.292 |
| P-value | **0.012** |
| Bodily discomfort | R | -0.250 |
| P-value | **0.032** |

*Pearson’s correlation was used*

*Bold p-values are significant at level≤0.05*

*IIEF-5: The international index of erectile function- 5items, PDQ 39: Parkinson’s disease questionnaire, ADL: Activities of daily life*

**Supplementary table 6:** Association between the MoCA scale and IIEF-5 categories among the participating Parkinson's patients (n=74)

| MoCA categorical | Normal | Total | | IIEF-5 | | | | | | | | | | P-value |
| --- | --- | --- | --- | --- | --- | --- | --- | --- | --- | --- | --- | --- | --- | --- |
| No ED | | Mild ED | | Mild to moderate ED | | Moderate ED | | Severe ED | |
| N | % | N | % | N | % | N | % | N | % | N | % |
| 7 | 9.5 | 2 | 28.6 | 1 | 14.3 | 4 | 57.1 | 0 | 0.0 | 0 | 0.0 | ***0.044** |
| Mild CI | 49 | 66.2 | 5 | 10.2 | 6 | 12.2 | 26 | 53.1 | 8 | 16.3 | 4 | 8.2 |
| Moderate CI | 18 | 24.3 | 0 | 0.0 | 0 | 0.0 | 7 | 38.9 | 6 | 33.3 | 5 | 27.8 |
| Severe CI | 0 | 0.0 | 0 | 0.0 | 0 | 0.0 | 0 | 0.0 | 0 | 0.0 | 0 | 0.0 |
| MoCA corrected score | | 20±1 | | 24±3abc | | 23±2de | | 21±4afg | | 18±4bdf | | 17±2ceg | | **^<0.001** |

*Variables are presented as numbers and percentages or means and standard deviation(SD)*

*IIEF-5: The international index of erectile function- 5 items, ED: Erectile dysfunction, MoCA:* *Montreal Cognitive Assessment, CI: Cognitive impairment*

** Chi-square test was used*

*^ One-way ANOVA test was used*

*Superscript letters show pairwise significance using LSD tests. Categories with the same letter show significance difference.*

*Bold p-values are significant at level≤0.05*
